# Supplementary material for: miR-145-5p Targets Sp1 in Non-Small Cell Lung Cancer Cells and Links to BMI1 Induced Pemetrexed Resistance and Epithelial–Mesenchymal Transition
Source: MDPI journal article supplement (doi:10.3390/ijms232315352), 2022-12-05
Supplement: s1 [file s1]

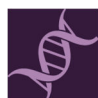

# Sp1 is targeted by miR-145-5p in non-small cell lung cancer cells and participates BMI1 induced pemetrexed resistance and epithelial-mesenchymal transition

Wen-Wei Chang <sup>1,2\*</sup>, Bing-Yen Wang <sup>3,4\*</sup>, Shih-Hong Chen <sup>1</sup>, Peng-Ju Chien <sup>1</sup>, Gwo-Tarn Sheu <sup>5</sup> and Ching-Hsiung Lin <sup>6,7,8,9\*</sup>

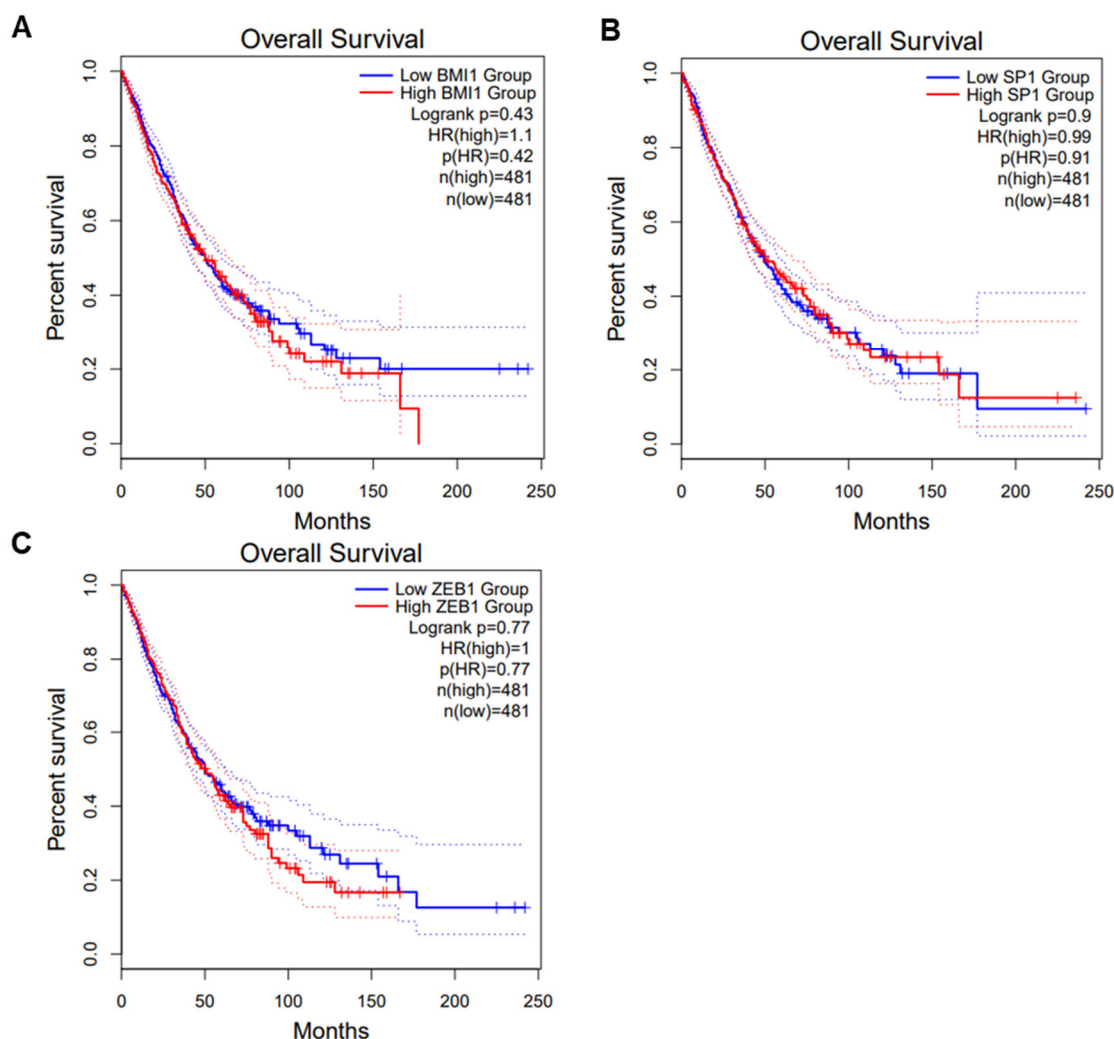

**Figure S1. Survival analysis of BMI1, SP1, or ZEB1 in NSCLC patients.** Survival analysis based on single gene of BMI1, SP1, or ZEB1 in NSCLC subjects of TCGA database was analyzed using GEPIA2 webtools using median expression level as the cut-off. The statistical analysis was performed by a log rank test.

**Table S1. The information of antibodies used in this study.**

| <i><b>Product</b></i>        | <i><b>Source</b></i>              | <i><b>Catalogue No.</b></i> |
|------------------------------|-----------------------------------|-----------------------------|
| <b>Primary antibody:</b>     |                                   |                             |
| anti-BMI1                    | Cell Signaling Technology, Inc.   | 6964s                       |
| anti-E-Cadherin              | Santa Cruz Biotechnology, Inc     | sc-21791                    |
| anti-N-Cadherin              | Santa Cruz Biotechnology, Inc     | sc-59987                    |
| anti-SNAI1                   | Cell Signaling Technology, Inc.   | 3879s                       |
| anti-ZEB1                    | GeneTex International Corporation | GTX105278                   |
| anti-GAPDH                   | GeneTex International Corporation | GTX100118                   |
| Anti- $\beta$ -actin         | Sigma-Aldrich                     | A5441                       |
| <b>Secondary antibodies:</b> |                                   |                             |
| anti-rabbit IgG-HRP          | GeneTex International Corporation | GTX221666-01                |
| anti-mouse IgG-HRP           | GeneTex International Corporation | GTX221667-01                |

**Table S2. Primer Sequences for the construction of Sp1 3'-UTR reporter vectors.**

| <b><i>Primer name</i></b> | <b><i>Sequences (5' to 3')</i></b>    |
|---------------------------|---------------------------------------|
| WT-F-EcoRI                | GAATTCTGTGGGATAAAGATTATGATTAGGG       |
| WT-R-XbaI                 | TCTAGAGCTGCGACCTTTCTTTCATC            |
| Mut-F                     | AGCTGCAGATCTTTGCTAG                   |
| Mut-R                     | ACAATGTGAAGATATTAACAATACAAAATATATTTTG |
